1 **TITLE PAGE**

2 ***In vitro* trypanocidal effect of sera from *Erythrocebus patas* (Red Patas monkey) and**  
3 ***Chlorocebus tantalus* (Tantalus monkey) on *Trypanosoma brucei brucei* Plimmer &**  
4 **Bradford, 1899 and *Trypanosoma congolense* Broden, 1894**

5 **Djieyep-Djemna, F., Nock, I.H., Aken'Ova T., Kogi, E., Djieyep, N.A.C.**

6 Dr. (Mrs.) Felicite Djieyep-Djemna, Department of Zoology and Animal Physiology, University  
7 of Buea, Cameroon. [felicite.djieyep@ubuea.cm](mailto:felicite.djieyep@ubuea.cm) Corresponding Author

8 Prof. Ishaya Haruna Nock, Department of Zoology, Ahmadu Bello University, Zaria, Nigeria.  
9 [nockih@gmail.com](mailto:nockih@gmail.com)

10 Prof. Thelma Aken'Ova, Department of Zoology, Ahmadu Bello University, Zaria, Nigeria.  
11 [akenovat@yahoo.com](mailto:akenovat@yahoo.com)

12 Dr. Ezekiel Kogi, Department of Zoology, Ahmadu Bello University, Zaria, Nigeria.  
13 [Ekogi.96@gmail.com](mailto:Ekogi.96@gmail.com)

14 Dr. Armand Claude Noundo Djieyep, Department of Medical Laboratory Sciences, University of  
15 Calabar, Nigeria. [djieyepnoundoarmand@gmail.com](mailto:djieyepnoundoarmand@gmail.com)

16

## 17 **ABSTRACT**

18 *Anti-Trypanosoma brucei brucei* and anti-*Trypanosoma congolense* activities of sera from two  
19 species of uninfected zoo-primates, *Erythrocebus patas* (red patas monkey) and *Chlorocebus*  
20 *tantalus* (tantalus monkey) were investigated. The sera were screened using thick films and  
21 haematocrit centrifugation technique (HCT), to ensure that the donor primates were not infected  
22 with trypanosomes. *Trypanosoma brucei brucei* (Federe strain) and *Trypanosoma congolense*  
23 were suspended in supplemented RPMI (Rossvelt Park Memorial Institute) 1640 medium and the  
24 motility of the parasite was used as index of viability after the addition of each test serum. The  
25 selected primate sera exhibited some degree of anti-*Trypanosoma brucei brucei* activities *in vitro*.  
26 Red patas monkey serum had an inhibition index of 0.27, while that of Tantalus monkey was 0.34,  
27 against *Trypanosoma brucei brucei*, with mean survival times of 22.00±1.73 hours for red patas  
28 monkey serum and 19.67±0.58 hours for tantalus monkey serum, which are significantly lower  
29 (P<0.05) than that of the control (30.00±0.00 hours). The selected primate sera had pronounced  
30 inhibitory activities against *Trypanosoma congolense*. Sera from the two species of primate had  
31 very high anti-*Trypanosoma congolense* activity showing an inhibition index of 0.91 for Red patas  
32 monkey serum and 0.90 for Tantalus monkey serum, with marked and significant reduction  
33 (P<0.05) in survival time of 7.00±1.73 hours in Red patas monkey serum and 7.67±0.58 hours in  
34 Tantalus monkey serum, compared with the control (74.00±1.00 hours). The *in vitro* anti-  
35 trypanosomal activity of the serum samples was shown to be cidal in nature. The activity was not  
36 associated with xanthine oxidase. This study revealed that sera from red patas monkey and tantalus  
37 monkey had a moderate anti-*Trypanosoma brucei brucei* activity and a very high anti-  
38 *Trypanosoma congolense* activity *in vitro* suggesting the presence of some non-specific materials.

39 **Keywords:** Zoo-primates, anti-*Trypanosoma brucei brucei* activity, anti-*Trypanosoma*  
40 *congolense* activity, survival time, inhibition index, xanthine oxidase, non-specific materials.

## 41 **Authors' Summary**

42 The mechanisms that allow trypanosomiasis-resistant animals to control blood trypanosomes are  
43 being investigated, to identify non-specific factors that kill trypanosomes or limit their  
44 proliferation, contributing to host resistance. For instance, xanthine oxidase has been isolated and

45 identified as the protein that kills trypanosomes in Cape buffalo. Humans and several other  
46 primates are also known to be resistant to infection by several animal-specific trypanosome  
47 species. In this study, sera from some zoo primates, red patas monkey and tantalus monkey, tested  
48 on *Trypanosoma brucei brucei* and *Trypanosoma congolense in vitro*, showed a slight anti-  
49 *Trypanosoma brucei brucei* activity and a very high anti-*Trypanosoma congolense* activity. These  
50 activities were shown to be cidal in nature and not associated with the protein xanthine oxidase.  
51 The authors suggest that non-specific factors other than the enzyme xanthine oxidase might have  
52 accounted for the sera anti-trypanosomal activities.

### 53 **Introduction**

54 African animal trypanosomiasis constitutes a major impediment to efficient and profitable  
55 livestock production in Africa generally and particularly in Nigeria. It causes about 3 million  
56 deaths annually in cattle and production losses of about US\$ 1.2 billion [1]. Although several  
57 measures have been used to attempt the control of the disease, the main control measure remains  
58 the use of trypanocidal drugs since the antigenic variation in the parasite has render the production  
59 of vaccine (using antibody) a very difficult task. Thus trypanosomiasis is still a great challenge to  
60 scientists. New control approaches are based on nonspecific factors. Some wild animals are known  
61 to be naturally trypanosomiasis-resistant. Natural resistance is attributable to natural specific  
62 antibodies and nonspecific serum factors capable of killing trypanosomes or limiting their rate of  
63 population growth, thereby contributing to the trypanotolerance/trypanoresistance of some  
64 animals. For instance, 3 distinct constitutive defense mechanisms against *T. brucei* have been  
65 detected by Black *et al.* [2], in sera from sub-Saharan mammals other than primates that show a  
66 high level of resistance to African trypanosomes, and they reported that these mechanisms act  
67 together with parasite-specific antibody responses to control the severity of infection arising in the

68 reservoir hosts [2]. In the same regard, some studies have also been carried out on some zoo  
69 primates [3], [4], [5]. The present study was targeting at investigating the presence of nonspecific  
70 factors against *T. brucei brucei* and *T. congolense*, in the sera of two species of Zoo Primates,  
71 *Erythrocebus patas* (Red patas monkey) and *Chlorocebus tantalus* (Tantalus monkey).

## 72 **Materials and methods**

### 73 *Ethical statement*

74 The ethical approval for this research was obtained from the Committee on Animal Use and Care,  
75 Directorate of Academic Planning & Monitoring, Ahmadu Bello University, Zaria, with the  
76 Approval No: ABUCAUC/2017/007. Local approval was given by the Director of Kano  
77 Zoological Garden. Blood samples were collected in accordance with best practice guidelines to  
78 minimise stress on donor primates. The laboratory animals used were kept in a clean aerated room  
79 and were given necessary care.

### 80 *Donnor primates and sampling sites*

81 Blood was collected from red patas monkey and tantalus monkey reared in an area free of  
82 trypanosomes, the Kano Zoological Garden, Kano State, Nigeria. Kano is 481 metres (1,578 feet)  
83 above sea level. The city lies to the north of the Jos Plateau, in the Sudanian Savanna region that  
84 stretches across the south of the Sahel. The city lies near where the Kano and Challawa rivers  
85 flowing from the southwest converge to form the Hadejia River, which eventually flows into Lake  
86 Chad to the east [6].

### 87 *Sample collection and trypanosome screening test*

88 This was done with the assistance of some experts. Each blood sample was aseptically collected  
89 from the donor animal through the femoral vein and was divided into two. One part was kept as  
90 whole using EDTA (ethyl-diamine-tetra-acetic acid) while the other one was dispensed into sterile  
91 plain glass test tube, allowed to clot for 2-3 hours at room temperature and serum was collected  
92 after centrifugation at 1,000 g [2] and stored in a freezer at -20°C after screening, for further  
93 analysis. The screening was done on each of the blood sample with EDTA, using two of the  
94 standard detection techniques (thick films) and haematocrit centrifugation technique (HCT) [7].

95

96 *In vitro detection of anti-trypanosomal activity of the test sera*

97 This was done using microtitre plates as follows:

- 98 - Trypanosomes from the buffy coat were suspended in RPMI 1640 (Rossvelt Park  
99 Memorial Institute 1640) medium supplemented with 2% glucose, 2mM sodium pyruvate,  
100 10% heat-inactivated (56 C, 30 min) fetal bovine serum [8], sodium bicarbonate and  
101 sodium pyruvate and antibiotics (streptomycin 100µg/ml, penicillin 100U/ml).
- 102 - 50µl of each monkey serum sample was introduced into one of the 96 wells of a microtitre  
103 plate and 50µl of *T. brucei brucei* or *T. congolense* suspension 8 per field ( $31.62 \times 10^6$ / ml  
104 of blood) was added to it, rocked gently to mix and incubated at room temperature.
- 105 - A drop of about 5µl of each mixture was examined microscopically, hourly using wet film  
106 method. Cessation in motility of parasites was taken as indication of serum activity against  
107 the parasites [9].

108 - The motility of *T. brucei brucei* or *T. congolense* in each well was compared with the  
109 motility of the same parasites in the control well without test serum.

110 A formula was derived [10] to determine the Anti-trypanosomal Activity Index (ATI) of each  
111 serum sample.

$$112 \quad \text{ATI} = \frac{T^c - T_s}{T^c}$$

113 Where:  $T_c$  is the survival time of the parasites in the control medium

114  $T_s$  is the survival time of the parasites in the sample

#### 115 *Infectivity assessment*

116 100µl of the mixture of the *in vitro* affected parasite with effective serum was inoculated into mice  
117 and monitored by microscopy for trypanosomes on daily basis, 10 and 30 days for *T. brucei brucei*  
118 and *T. congolense* respectively, to determine if the observed anti-trypanosomal activity was  
119 inhibitory or cidal.

#### 120 *Detection of the xanthine oxidase content of the selected sera*

121 The technique of Black *et al.* [2] was adopted to detect the xanthine oxidase content of the test  
122 sera. Accordingly, aliquots (100 µl) of each serum was added to 900 µl of H<sub>2</sub>O<sub>2</sub>-assay buffer (0.5  
123 mM xanthine and 1 mM 2, 4, 6 tribromo-3-hydroxybenzoic acid in 0.1 mM 4-amino-antipyrine  
124 with a final concentration of 8 units horse-radish peroxidase per ml). The mixture was incubated  
125 at 25°C for 30 min, immediately chilled in an ice bath, and absorbance read at 512 nm wave length  
126 was recorded after zeroing the spectrophotometer with an equivalent mixture lacking horseradish  
127 peroxidase. A serial dilution of the commercial cow's milk xanthine oxidase was done; absorbance

128 was also recorded at 512 nm wave length and used to plot a standard curve. It has been established  
129 that detection of H<sub>2</sub>O<sub>2</sub> produced in serum by this assay is not affected by other enzymes in serum,  
130 including catalase [11]. The xanthine oxidase content of serum was determined by reading the  
131 serum value against the cow's milk xanthine oxidase standard curve.

### 132 *Data analysis*

133 One-way Analysis of variance (ANOVA) was used for sera's inter-species comparison of the  
134 parasites survival time. Student's t-test was used to compare the mean survival time of the two  
135 species of parasites, *T. brucei brucei* and *T. congolense* in the test sera. The significant difference  
136 was at the level of probability 0.5. All data were expressed as means  $\pm$  Standard Error.

## 137 **Results**

### 138 *Trypanosome Infection Status of Sera from Selected Primates*

139 Blood samples from selected monkeys were negative for trypanosomes by thick blood film and  
140 haematocrit centrifugation technique (HCT).

141

### 142 *The effect of sera from Red patas monkey and Tantalus monkey on T. brucei brucei*

143 There was no significant difference in the trypanosomal activity of the sera of both primates  
144 (22.00 $\pm$ 1.73 and 19.67 $\pm$ 0.58 hours respectively); meanwhile, the mean survival times of the  
145 parasites in these sera were significantly lower (P<0.05) than that of the control, the RPMI 1640  
146 (30.00 $\pm$ 0.00 hours), showing a slight anti-*Trypanosoma brucei brucei* activity with ATI values of  
147 0.27 and 0.34 respectively (Table 1).

148 **Table 1:** Effect of sera of selected Zoo Primates on *T. brucei brucei* *in vitro*

| Source of serum                               | Survival time (hrs)     | ATI  |
|-----------------------------------------------|-------------------------|------|
| <i>Erythrocebus patas</i> (Red Pattas monkey) | 22.00±1.73 <sup>a</sup> | 0.27 |
| <i>Chlorocebus tantalus</i> (Tantalus monkey) | 19.67±0.58 <sup>a</sup> | 0.34 |
| RPMI 1640                                     | 30.00±0.00 <sup>b</sup> | 0    |

149 Values are mean ± standard deviation. Values with different superscripts down the column are  
150 significantly different (P<0.05). ATI: Anti-trypanosomal activity Index.

151

152 *The effect of sera from Red patas monkey and Tantalus monkey on T. congolense*

153 Sera from the selected zoo primates exhibited very high anti-*Trypanosoma congolense* activity *in*  
154 *vitro* with very high index, close to one (ATI of 0.91 for Red pattas monkey and 0.90 for Tantalus  
155 monkey). This was shown by a very reduced survival time of *T. congolense* 7.00±1.73 hours in  
156 Red pattas monkey serum and 7.67±0.58 hours in Tantalus monkey (Table 2). These two values  
157 are not statistically different (P>0.05) from each other, but both are significantly (P<0.05) lower  
158 than the control, the RPMI 1640 (74.00±1.00 hours).

159 **Table 2:** Effect of sera of selected Zoo Primates on *T. congolense*

| Source of serum                               | Survival time (hrs)    | ATI  |
|-----------------------------------------------|------------------------|------|
| <i>Erythrocebus patas</i> (Red Pattas monkey) | 7.00±1.73 <sup>a</sup> | 0.91 |
| <i>Chlorocebus tantalus</i> (Tantalus monkey) | 7.67±0.58 <sup>a</sup> | 0.90 |



---

|                  |                         |   |
|------------------|-------------------------|---|
| <b>RPMI 1640</b> | 74.67±1.00 <sup>b</sup> | 0 |
|------------------|-------------------------|---|

---

160  
 161 Values are mean ± standard deviation. Values with different superscripts down the column are  
 162 significantly different (P<0.05). ATI: Anti-trypanosomal activity Index.

163  
 164 *The compared effect of sera from Red patas monkey and Tantalus monkey on T. bucei brucei and*  
 165 *T. congolense in vitro*

166 Each of these sera had a very high anti-*Trypanosoma congolense* activity Index (ATI), 0.91 for  
 167 Red pattas monkey and 0.90 for Tantalus monkey. This was very high compared to their activity  
 168 index against *T. brucei brucei* (0.27 for Red patas monkey and 0.34 for Tantalus monkey). The  
 169 survival times of *T. congolense* in these sera are significantly lower (P<0.05) than that of *T. brucei*  
 170 *brucei* in the same sera (Table 3).

171 **Table 3:** Compared effect of sera from selected Zoo primates on *T. brucei brucei* and *T.*  
 172 *congolense in vitro*

---

| <b>Source of serum</b>                               | <b>Survival time of <i>T. brucei</i></b> | <b>ATI on <i>T. brucei</i></b> | <b>Survival time of <i>T. congolense</i></b> | <b>ATI of the serum on <i>T. congolense</i></b> |
|------------------------------------------------------|------------------------------------------|--------------------------------|----------------------------------------------|-------------------------------------------------|
| <b>Red Pattas monkey (<i>Erythrocebus patas</i>)</b> | 22.00±1.73 <sup>b</sup>                  | 0.27                           | 7.00±1.73 <sup>a</sup>                       | 0.91                                            |
| <b><i>Chlorocebus tantalus</i> (Tantalus monkey)</b> | 19.67±0.58 <sup>b</sup>                  | 0.34                           | 7.67±0.58 <sup>a</sup>                       | 0.90                                            |
| <b>RPMI 1640</b>                                     | 30.00±0.00 <sup>a</sup>                  | 0                              | 74.00±1.00 <sup>b</sup>                      | 0                                               |

---

173 Values are mean  $\pm$  standard deviation. Values with different superscripts across the rows are significantly  
174 different ( $P < 0.05$ ). ATI: Anti-trypanosomal activity Index.

175 *Infectivity*

176 None of the parasites affected by the test sera *in vitro* was able to cause infection to the mice.

177 *Xanthine oxidase content of sera of selected zoo primates*

178 The xanthine oxidase content of sera of the selected zoo primates is presented in Figure 1. It was  
179 observed that concentration of xanthine oxidase in the serum of red patas monkey was significantly  
180 higher ( $P < 0.05$ ) than that of Tantalus monkey ( $2.26 \pm 0.10$  and  $1.02 \pm 0.33$   $\mu\text{g/ml}$  respective.

181

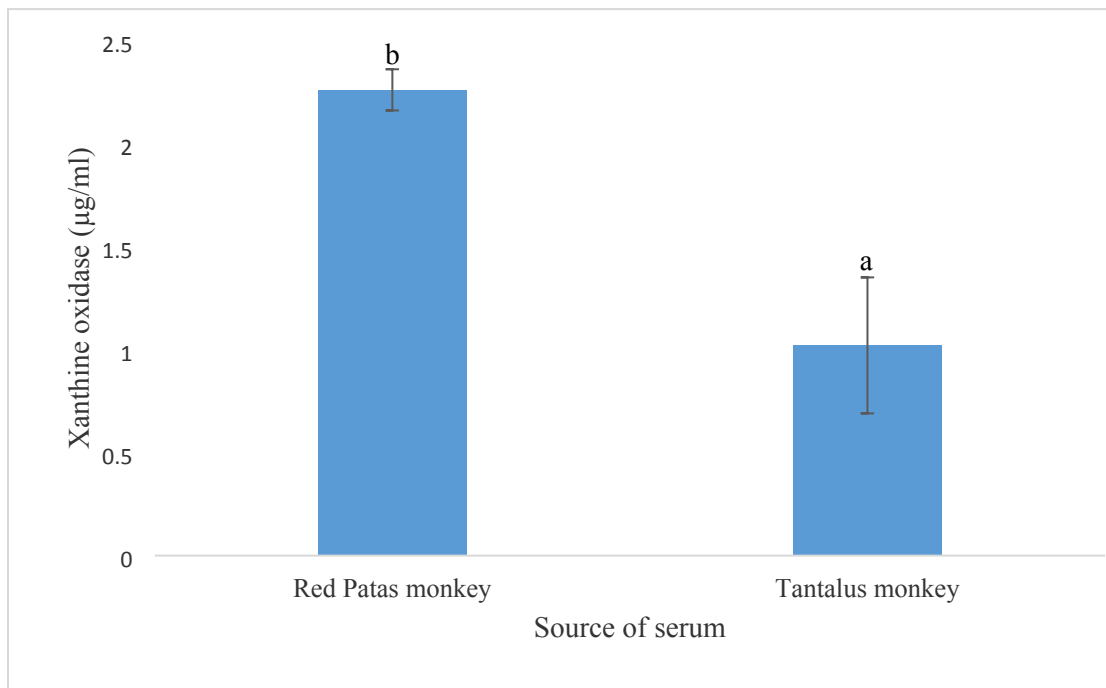

182

183 **Figure 1:** Xanthine oxidase content of sera of selected zoo primates

184 Values are mean concentrations. Values with different superscripts are significantly different  
185 ( $P < 0.05$ ).

## 186 Discussion

187 A simple technique was employed using the motility of trypanosomes as indicator of parasites  
188 viability [9] as it has long been established that parasites motility could be a measure of viability  
189 among most zooflagellate parasites [12]. Also, Atawodi *et al.* [13] reported that the technique  
190 correlated well with other *in vitro* methods.

191 The fact that sera from the two zoo primates, Red patas monkey and Tantalus monkey showed a  
192 slight anti-*Trypanosoma brucei brucei* activity Index (ATI of 0.27 and 0.34 respectively) and a  
193 very high anti-*Trypanosoma congolense* activity Index *in vitro* (ATI of 0.91 and 0.90 respectively)  
194 with a highly reduced mean survival time of the parasites of about  $7.00 \pm 1.73$  hours for red patas  
195 monkey and  $7.67 \pm 0.58$  hours for tantalus monkey, demonstrate an innate immunity of these  
196 primates to *T. congolense*, and to some lesser extend to *T. brucei brucei*. Human and several other  
197 primates are known to be resistant to infection by several animal-specific trypanosome species  
198 including *T. brucei brucei*, *T. congolense*, *T. vivax* and *T. evansi* [3]. The results obtained suggest  
199 that Red pattas monkey serum as well as Tantalus monkey serum might possess some trypanolytic  
200 factors against *T. congolense*, and to some lesser extend against *T. brucei brucei*. This claim can  
201 be supported by the fact that the innate immunity of human and several other primates to the  
202 trypanosomes is due to the expression of a unique subset of high-density lipoproteins (HDLs)  
203 referred to as the trypanosome lytic factors (TLFs) in their blood [3]. Being that the trypanosome  
204 lytic factor is primarily composed of Apolipoprotein L1 (APOL1) and a haptoglobin-related  
205 protein [14], and considering the findings of Jirku *et al.*, [4] who demonstrated that mandrill serum  
206 was able to efficiently lyse *T. brucei brucei* and *T. brucei rhodesiense*, and to some extent *T. bucei*  
207 *gambiense*, while the chimpanzee serum failed to lyse any of these subspecies because of the  
208 secondary loss of the APOL1 gene, the anti-trypanosomal activity of red pattas monkey and

209 tantalus monkey sera observed in this study could be attributable to Apolipoprotein L1 (APOL1).  
210 These findings also correlate with some previous ones among which the identification of an  
211 Apolipoprotein L1 (APOL1) in a subset of Old World monkeys [15], [16], [17], [18], the  
212 demonstration of the *in vitro* lytic ability of serum and purified recombinant protein of an  
213 Apolipoprotein L1 (APOL1) ortholog from the West African Guinea baboon (*Papio papio*), which  
214 is able to lyse all subspecies of *T. brucei* including *T. brucei gambiense* [5].

215 The parasites were inactivated by the monkeys' sera *in vitro* and unable to cause infection to mice  
216 suggesting that the anti-trypanosomal activity observed could be cidal. Considering the fact that  
217 the sera were obtained from primates that had not previously been exposed to trypanosome  
218 infection, these results are also suggestive of the nonspecific nature of the anti-trypanosomal  
219 materials present in the sera. The difference in the xanthine oxidase content of sera from red patas  
220 monkey and Tantalus monkey indicates that the similar anti-trypanosomal activity observed is not  
221 associated to the activity of this enzyme. This finding gives more support to our suggestion on the  
222 possible trypanolytic factor previously mentioned.

223

## 224 **Conclusion**

225 This study revealed anti-*Trypanosoma brucei brucei* and anti-*Trypanosoma congolense* properties  
226 of the sera of the two zoo primates, Red patas monkey and Tantalus monkey *in vitro*. Both sera  
227 had slight anti-*Trypanosoma brucei brucei* activity and a very high anti-*Trypanosoma congolense*  
228 activity *in vitro*. These activities, showing some innate immunity is attributable to some  
229 nonspecific factors (trypanolytic factors) present in the sera of the Red patas monkey and the  
230 Tantalus monkey.

231 **Acknowledgement**

232 The authors would like to thank the officers and staff of the Kano Zoological garden, Kano state,  
233 Nigeria, for approving the collection of blood samples from their animals. We are also grateful to  
234 the managements of the Departments of Microbiology, Faculty of Life Sciences, Parasitology and  
235 Entomology Faculty of Veterinary Medicine all of the Ahmadu Bello University, Zaria, for  
236 permitting us to use their facilities and their technical staffs.

237

238 **References**

- 239 (1) Chamond, N., Cosson, A., Blom-Potar, M.C., Jouvion, G., D'Archivio, S., Medina, M.,  
240 Droin-Bergère, S., Huerre, M., Goyard, S., Minoprio, P. (2010). *Trypanosoma vivax*  
241 Infections: Pushing Ahead with Mouse Models for the Study of *Nagana*. I. Parasitological,  
242 Hematological and Pathological Parameters. *PLoS Neglected Tropical Diseases*, 10;4 (8):  
243 e792.
- 244 (2) Black, S.J., Wang, Q., Makadzange, T., Li, Y., Van Praagh, A., Loomis, M. and Seed, J.R.  
245 (1999). Anti-trypanosoma brucei activity of nonprimate zoo sera. *American Society of*  
246 *Parasitology, Journal of Parasitology* 85 (1): 48-53.
- 247 (3) Namangala, B. (2011). How the African trypanosomes evade host immune killing.  
248 *Parasite Immunology*. 33 (8):430-7. doi: 10.1111/j.1365-3024.2011.01280.x.
- 249 (4) Jirků, M., Votýpka, J., Petrželková, K.J., Jirků-Pomajbíková, K., Kriegová, E., Vodička, R.,  
250 Lankester, F., Leendertz, S.A.J., Wittig, R.M., Boesch, C., Modrý, D., Ayala, F.J.,  
251 Leendertz, F.H. and Lukeš, J. (2015). Wild chimpanzees are infected by *Trypanosoma*  
252 *brucei*. *International Journal of Parasitology. Parasites Wildl*, 4 (3): 277–282.

- 253 (5) Cooper, A., Capewell, P., Clucas, C., Veitch, N., Weir, W., Thomson, R., Raper, J.,  
254 MacLeod, A. (2016). A Primate APOL1 Variant That Kills *Trypanosoma brucei gambiense*.  
255 *PLOS Neglected Tropical Diseases*, **10** (8): e0004903. doi: 10.1371/journal.pntd.0004903.  
256 eCollection 2016.
- 257 (6) Kano. Available from: <https://en.wikipedia.org/wiki/Kano>
- 258 (7) Woo, P.T.K. (1989), The haematocrit centrifuge for the detection of trypanosomes in blood.  
259 *Canadian Journal of Zoology*. **47**: 921-923.
- 260 (8) Black, S.J. and Vandeweerd, V. (1989). Serum lipoproteins are required for multiplication  
261 of *Trypanosoma brucei* under axenic conditions. *Molecular and Biochemical*  
262 *Parasitology*, **37**: 65-72.
- 263 (9) Bulus, T., Atawodi, S.E. and Mamman, M. (2008). *In vitro* Antitrypanosomal Activity  
264 and Phytochemical Screening of Aqueous and Methanol Extracts of *Terminalia*  
265 *avicennioides*. *Nigerian Journal of Biochemistry and Molecular Biology*, **23** (1): 7 – 11.
- 266 (10) Djieyep-Djemna, F., Kogi, E., Nock, I.H., Aken'Ova, T.O.L. (2017). A Model for  
267 Determination of *In Vitro* Trypanosomal Activity Status Of Sera Using An Anti-  
268 *Trypanosoma* Activity Index (ATI). *Parasitology and Public Health Society of Nigeria*.  
269 Abstract No. PPSN/2017/ABS/115. P. 84.
- 270 (11) Le Tissier, P. R., Peters, J. and Skidmore, C. J. (1994). Development of an assay method  
271 for purine catabolic enzymes in the mouse and its adaptation for use on an autoanalyzer.  
272 *Analytical Biochemistry*, **222**:168-175.
- 273 (12) Peter, D., Honigberg, B.M. and Fern, A.M. (1976). An improved method of  
274 cryopreservation of *Trypanosoma (Nannomonas) Congolense* brooden in liquid nitrogen.  
275 *Journal of Parasitology*, **62** (1): 136-137.

- 276 (13) Atawodi, S.E., Bulus, T., Ibrahim, S., Ameh, D.A., Nok, A.J., Mamman, M., Galadima,  
277 M. (2003). *In vitro* trypanocidal effect of methanolic extract of some Nigerian savannah  
278 plants. *African Journal of Biotechnology*, **2** (9): 317–321.
- 279 (14) Raper, J., and Friedman, D.J. (2013). Parasitology: molecular one-upmanship. *Nature*,  
280 **501**:322–323.
- 281 (15) Lugli, E.B., Pouliot, M., Portela, M.D.P.M., Loomis, M.R., Raper, J. (2004).  
282 Characterization of primate trypanosome lytic factors. *Molecular and Biochemical*  
283 *Parasitology*, **138**(1):9–20. pmid:1550091.
- 284 (16) Poelvoorde, P., Vanhamme, L., Van Den Abbeele, J., Switzer, W.M., Pays, E. (2004).  
285 Distribution of apolipoprotein L-I and trypanosome lytic activity among primate sera.  
286 *Molecular and Biochemical Parasitology*, **134**:155–157. pmid:14747153.
- 287 (17) Thomson, R., Molina-Portela, P., Mott, H., Carrington, M., Raper, J. (2009).  
288 Hydrodynamic gene delivery of baboon trypanosome lytic factor eliminates both animal  
289 and human-infective African trypanosomes. *Proceeding of National Academic Sciences*  
290 *USA*. **106**: 19509–19514.
- 291 (18) Thomson, R., Genovese, G., Canon, C., Kovacsics, D., Higgins, M.K, Carrington, M.  
292 (2014). Evolution of the primate trypanolytic factor APOL1. *Proceedings of National*  
293 *Academic Sciences, USA. National Academic Sciences*, **111**: 2130–2139.
